# Supplementary material
Source: ML conference proceedings conference paper supplement (https://openaccess.thecvf.com/content/ICCV_2019/html/Lu_DeepVCP_An_End-to-End_ICCV_2019_paper.html)
Supplement: Supplementary file 1 [file Lu_DeepVCP_An_End-to-End_ICCV_2019_supplemental.pdf]

Archive with 5 entries (4 files):
- DeepVCP_W.Lu_S.Song_ICCV2019_480p.mp4
- __MACOSX/
- __MACOSX/._DeepVCP_W.Lu_S.Song_ICCV2019_480p.mp4
- DeepVCP_W.Lu_S.Song_ICCV2019_Supplemental.pdf
- __MACOSX/._DeepVCP_W.Lu_S.Song_ICCV2019_Supplemental.pdf
