# Supplementary material
Source: ML conference proceedings conference paper supplement (https://openaccess.thecvf.com/content/ICCV_2019/html/Lu_DeepVCP_An_End-to-End_ICCV_2019_paper.html)
Supplement: Supplementary file 1 [file Lu_DeepVCP_An_End-to-End_ICCV_2019_supplemental.pdf › DeepVCP_W.Lu_S.Song_ICCV2019_Supplemental.pdf]

# DeepVCP: An End-to-End Deep Neural Network for Point Cloud Registration

ICCV 2019 Supplementary Material

Weixin Lu   Guowei Wan   Yao Zhou   Xiangyu Fu   Pengfei Yuan   Shiyu Song\*

Baidu Autonomous Driving Technology Department (ADT)

{luweixin, wanguowei, zhouyao, fuxiangyu, yuanpengfei, songshiyu}@baidu.com

## 1. Implementation Details

We introduce our implementation details in this section.

In the FE layer, a simplified PointNet++ is applied, in which only three *set abstraction* layers with a single *scale grouping* layer are used to sub-sample points into groups with sizes 4096, 1024, 256, and the MLPs of three hierarchical PointNet layer are  $32 \times 32$ ,  $32 \times 64$ ,  $64 \times 64$  in the sub-sampling stage, and  $64 \times 64$ ,  $32 \times 32$ ,  $32 \times 32 \times 32$  in the up-sampling stage. This is followed by a fully connected layer with 32 kernels and a dropout layer with the keeping probability as 0.7 to avoid overfitting. The MLP in the point weighting layer is  $16 \times 8 \times 1$ , and only the top  $N = 64$  points are selected in the source point cloud according to their learned weights in the descending order. The searching range  $d$  and the number of neighboring points  $K$  to be collected in the DFE step are set to be  $1m$  and 32, respectively. In the mini-PointNet structure of the DFE layer, the MLP is  $32 \times 32 \times 32$ . The 3D CNNs settings in the CPG step are Conv3d(16, 3, 1) - Conv3d(4, 3, 1) - Conv3d(1, 3, 1). The grid voxels are set as  $(\frac{2 \times 2.0}{0.4} + 1, \frac{2 \times 2.0}{0.4} + 1, \frac{2 \times 2.0}{0.25} + 1)$ .

The proposed network is trained with the batch size as 1, the learning rate as 0.01 and the decay rate as 0.7 with the decay step to be 10000. During the training stage, we conduct the data augmentation and supervised training by adding a uniformly distributed random noise of  $[0.0 \sim 1.0]m$  in the  $x$ ,  $y$  and  $z$  dimensions, and  $[0 \sim 1.0]^\circ$  in the *roll*, *yaw*, and *pitch* dimensions to the given ground truth. We randomly divide the dataset into the training and validation set, yielding the ratio of training to validation as 4 to 1. We stop at 200 epochs when there is no performance gain.

We list the configuration settings of all the baseline methods in Table 1. We use these parameters in the experiments across all the KITTI, Apollo-SouthBay and 3DMatch datasets.

## 2. More Implementation Details of the AA-ICP

The Euler angles are used as the rotation representation when solving the optimal weighting terms  $\alpha$  based on the history of the latest iterations and residuals in the original implementation of the AA-ICP [2]. It is known that the Euler angles have the singularity problem. In rare cases when we test using the Apollo-SouthBay dataset, we noted that it caused the estimated Euler angles to flip across the axes in our experimental results using the original implementation. Certainly, this results in the algorithm failing to converge. Therefore, we modified the implementation by limiting the valid value range of the Euler angles  $(\alpha, \beta, \gamma)$  to be  $[-90, 90]^\circ$ ,  $[-180, 180]^\circ$  and  $[-180, 180]^\circ$

and the interpolation between the two orientations will always use the shortest path. The comparison of the results using the original and modified version is shown in Table 2.

## 3. More Results on Other Datasets

We evaluate the performance of the proposed DeepVCP using datasets from the sensors other than the Velodyne HDL64 LiDAR, including the 3DMatch [3] and the TLS [1] dataset.

### 3.1. The 3DMatch Dataset

The point clouds in the 3DMatch dataset are collected by RGB-D sensors (e.g. Microsoft Kinect, Intel RealSense). Most methods do not converge when we use the original point cloud pairs in the 3DMatch dataset, due to the very small overlap between each pair. Therefore, we synthesize the new data pair by downsampling one of the point clouds to approximately 150,000 points, duplicating and shifting it with large random initial transformations, and finally adding random errors of less than  $0.01m$  to each point in the new point cloud. With the help of the sequential storage in 3DMatch, we take the first 90% and the last 90% points in each point cloud to let the two generated point clouds have an approximate 90% overlap. To conduct a comprehensive evaluation, we gradually increase the initial pose errors during our experiments. The complete results are summarized in Tab. 3 and Tab. 4. We consider the results with the maximum errors larger than  $5.0m$  and  $80.0^\circ$  as non-convergence, marked as “N/A” in the table. The mean value calculation is computed by ignoring the non-convergence cases to show the average performance when they work normally.

The searching range  $d$  and the grid voxel size are set as  $0.8m$  and  $(\frac{2 \times 4.0}{0.5} + 1, \frac{2 \times 4.0}{0.5} + 1, \frac{2 \times 4.0}{0.5} + 1)$ , respectively. But to keep CPD not intractable, we once again downsample the point clouds using a voxel size of  $0.015m$  leaving about 50,000 points. All other settings are consistent with the experiments in the main conference proceeding. As can be seen, the performance of the ICP family and the NDT gradually deteriorates as the initial pose errors increase while the CPD and 3DFeat-Net methods are still stable. The CPD and 3DFeat-Net methods match globally so they are expected to be insensitive to the initial errors. By using deep features that are powerful enough to find correct matching keypoints, our DeepVCP achieves good accuracy under large initial errors.

### 3.2. The TLS dataset

The TLS dataset [1] is from Terrestrial Laser Scanners (TLS), e.g. a Rigel LiDAR. We downsample the original point clouds with a voxel grid of  $0.0625m$  and leave about

\* Author to whom correspondence should be addressed

|                                          | variable                         | value                         |
|------------------------------------------|----------------------------------|-------------------------------|
| Registration (Base Class in PCL)         | nr_iterations_                   | 0                             |
|                                          | max_iterations_                  | 600                           |
|                                          | ransac_iterations_               | 0                             |
|                                          | transformation_epsilon_          | 1e-6                          |
|                                          | transformation_rotation_epsilon_ | 0.0                           |
|                                          | inlier_threshold_                | 0.05                          |
|                                          | min_number_correspondences_      | 3 (4 for G-ICP)               |
|                                          | euclidean_fitness_epsilon_       | 1e-4                          |
|                                          | corr_dist_threshold_             | 1.0 (0.5 for ICP-Po2Pl)       |
| IterativeClosestPoint (ICP)              | x_idx_offset_                    | 0                             |
|                                          | y_idx_offset_                    | 0                             |
|                                          | z_idx_offset_                    | 0                             |
|                                          | nx_idx_offset_                   | 0                             |
|                                          | ny_idx_offset_                   | 0                             |
|                                          | nz_idx_offset_                   | 0                             |
| GeneralizedIterativeClosestPoint (G-ICP) | k_correspondences_               | 20                            |
|                                          | gicp_epsilon_                    | 0.001                         |
|                                          | rotation_epsilon_                | 2e-3                          |
|                                          | mahalanobis_                     | 0                             |
|                                          | max_inner_iterations_            | 20                            |
| NormalDistributionsTransform (NDT)       | resolution_                      | 1.0 (0.1 for 3DMatch dataset) |
|                                          | step_size_                       | 0.1 (0.9 for 3DMatch dataset) |
|                                          | outlier_ratio_                   | 0.55                          |
| AndersonIterativeClosestPoint (AA-ICP)   | alpha_limit_min_                 | -10                           |
|                                          | alpha_limit_max_                 | 10                            |
|                                          | beta_                            | 1.0                           |
|                                          | small_step_threshold_            | 3                             |
|                                          | error_overflow_threshold_        | 0.05                          |
| Transform (CPD)                          | m_correspondence                 | false                         |
|                                          | m_max_iterations                 | 200                           |
|                                          | m_normalize                      | true                          |
|                                          | m_outliers                       | 0.2                           |
|                                          | m_sigma2                         | 0.0                           |
|                                          | m_tolerance                      | 1e-5                          |
| Rigid (CPD)                              | m_reflections                    | false                         |
|                                          | m_scale                          | false                         |

Table 1. The configuration settings of the baseline methods in the experiments. The ICP family and the NDT all inherit from a common base class in which the parameters are shared across all these methods.

| Dataset         | Method   | Angular Error( $^{\circ}$ ) |       | Translation Error( $m$ ) |       |
|-----------------|----------|-----------------------------|-------|--------------------------|-------|
|                 |          | Mean                        | Max   | Mean                     | Max   |
| KITTI           | Original | 0.152                       | 1.406 | 0.096                    | 1.813 |
|                 | Modified | 0.145                       | 1.406 | 0.088                    | 2.020 |
| Apollo-SouthBay | Original | 0.363                       | 179.9 | 0.119                    | 5.675 |
|                 | Modified | 0.054                       | 1.087 | 0.109                    | 5.243 |

Table 2. Comparison of the original and modified version of the AA-ICP implementation. The issue of irregularly large maximum angle errors in rare cases of Apollo-SouthBay dataset is resolved.

$(\frac{2 \times 2.0}{0.4} + 1, \frac{2 \times 2.0}{0.4} + 1, \frac{2 \times 2.0}{0.4} + 1)$ . Three different scenes in the dataset are evaluated. Please note, that we certainly can not train the network adequately with this little amount of data. It is highly possible that the results are overfitted, and therefore are only visually evaluated. The registration results of a courtyard, an office and a forest are shown in Figure 1, Figure 2 and Figure 3, respectively.

130,000 points as our input. We once again adjust the searching range  $d$  and the grid voxels' size accordingly, to  $0.5m$  and

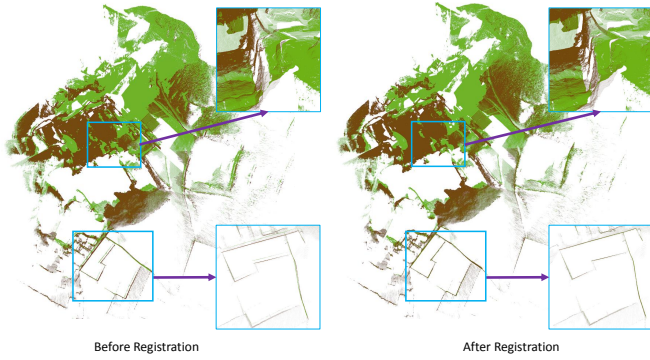

Figure 1. The registration result of a courtyard from the TLS dataset. The point cloud pair is differently colored. From the zoomed figures, we observe that the mountain terrain in the center and the walls of the building at the bottom are aligned well after the registration.

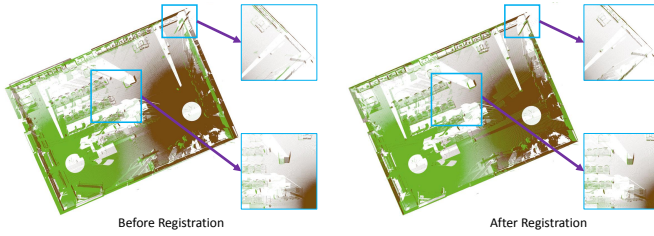

Figure 2. The registration result of an office from the TLS dataset. As shown in the zoomed figures, the desks, chairs, and walls are aligned well after the registration.

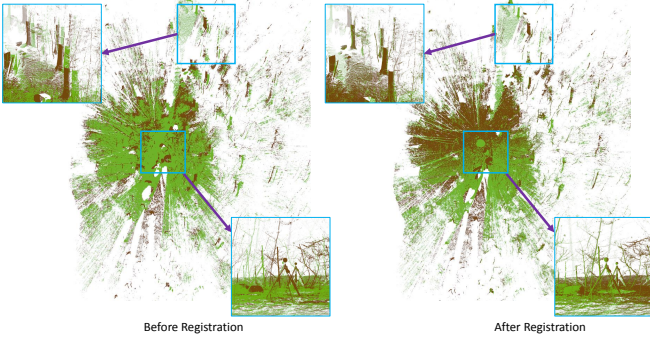

Figure 3. The registration result of a forest from the TLS dataset. From the zoomed figures, the trunks and the tripod are aligned well after the registration.

## References

- [1] TLS Dataset. <http://www.igp.ethz.ch/>, 2017.
- [2] Artem Leonidovich Pavlov, George Ovchinnikov, D. Yu. Derbyshev, Dzmitry Tsetserukou, and Ivan Oseledets. AA-ICP: Iterative closest point with Anderson acceleration. In *2018 IEEE International Conference on Robotics and Automation (ICRA)*, pages 1–6, May 2018.
- [3] Andy Zeng, Shuran Song, Matthias Nießner, Matthew Fisher, Jianxiong Xiao, and Thomas Funkhouser. 3DMatch: Learning local geometric descriptors from RGB-D reconstructions. In *IEEE Conference on Computer Vision and Pattern Recognition (CVPR)*, 2017.

| Initial Error          |      | ICP-Po2Po<br>( <i>m</i> ) | ICP-Po2Pl<br>( <i>m</i> ) | G-ICP<br>( <i>m</i> ) | AA-ICP<br>( <i>m</i> ) | NDT-P2D<br>( <i>m</i> ) | CPD<br>( <i>m</i> ) | 3DFeat-Net<br>( <i>m</i> ) | Ours<br>( <i>m</i> ) |
|------------------------|------|---------------------------|---------------------------|-----------------------|------------------------|-------------------------|---------------------|----------------------------|----------------------|
| (0.1 <i>m</i> , 1.0°)  | Mean | 0.023                     | 0.012                     | 0.012                 | 0.018                  | 0.005                   | 0.004               | 0.072                      | 0.019                |
|                        | Max  | 0.092                     | 0.053                     | 0.065                 | 0.097                  | 0.017                   | 0.024               | 0.257                      | 0.073                |
| (0.2 <i>m</i> , 2.0°)  | Mean | 0.024                     | 0.012                     | 0.015                 | 0.018                  | 0.009                   | 0.004               | 0.072                      | 0.021                |
|                        | Max  | 0.091                     | 0.054                     | 0.120                 | 0.097                  | 0.206                   | 0.024               | 0.257                      | 0.065                |
| (0.3 <i>m</i> , 3.0°)  | Mean | 0.025                     | 0.012                     | 0.013                 | 0.019                  | 0.052                   | 0.004               | 0.072                      | 0.018                |
|                        | Max  | 0.092                     | 0.056                     | 0.044                 | 0.097                  | 0.800                   | 0.024               | 0.257                      | 0.071                |
| (0.4 <i>m</i> , 4.0°)  | Mean | 0.026                     | 0.012                     | 0.014                 | 0.019                  | 0.170                   | 0.004               | 0.072                      | 0.019                |
|                        | Max  | 0.093                     | 0.055                     | 0.055                 | 0.097                  | 1.219                   | 0.024               | 0.257                      | 0.052                |
| (0.5 <i>m</i> , 5.0°)  | Mean | 0.026                     | 0.012                     | 0.014                 | 0.021                  | 0.282                   | 0.004               | 0.072                      | 0.019                |
|                        | Max  | 0.093                     | 0.055                     | 0.051                 | 0.258                  | 1.535                   | 0.024               | 0.257                      | 0.060                |
| (0.6 <i>m</i> , 6.0°)  | Mean | 0.026                     | 0.012                     | 0.015                 | 0.019                  | 0.478                   | 0.004               | 0.072                      | 0.018                |
|                        | Max  | 0.093                     | 0.056                     | 0.062                 | 0.119                  | 4.804                   | 0.024               | 0.257                      | 0.053                |
| (0.7 <i>m</i> , 7.0°)  | Mean | 0.026                     | 0.012                     | 0.015                 | 0.019                  | 0.514                   | 0.004               | 0.072                      | 0.018                |
|                        | Max  | 0.094                     | 0.055                     | 0.064                 | 0.098                  | N/A                     | 0.024               | 0.257                      | 0.064                |
| (0.8 <i>m</i> , 8.0°)  | Mean | 0.026                     | 0.012                     | 0.017                 | 0.018                  | 0.709                   | 0.004               | 0.072                      | 0.017                |
|                        | Max  | 0.094                     | 0.055                     | 0.153                 | 0.098                  | 4.889                   | 0.024               | 0.257                      | 0.057                |
| (0.9 <i>m</i> , 9.0°)  | Mean | 0.026                     | 0.012                     | 0.020                 | 0.024                  | 0.817                   | 0.004               | 0.072                      | 0.017                |
|                        | Max  | 0.093                     | 0.055                     | 0.522                 | 0.640                  | 4.818                   | 0.024               | 0.257                      | 0.052                |
| (1.0 <i>m</i> , 10.0°) | Mean | 0.026                     | 0.035                     | 0.026                 | 0.024                  | 1.007                   | 0.004               | 0.072                      | 0.016                |
|                        | Max  | 0.094                     | 2.340                     | 0.599                 | 0.585                  | 4.850                   | 0.024               | 0.257                      | 0.050                |
| (1.1 <i>m</i> , 11.0°) | Mean | 0.027                     | 0.075                     | 0.022                 | 0.120                  | 0.949                   | 0.004               | 0.072                      | 0.019                |
|                        | Max  | 0.093                     | 2.502                     | 0.390                 | 5.147                  | 4.120                   | 0.024               | 0.257                      | 0.077                |
| (1.2 <i>m</i> , 12.0°) | Mean | 0.089                     | 0.059                     | 0.057                 | 0.152                  | 1.243                   | 0.004               | 0.072                      | 0.018                |
|                        | Max  | 4.334                     | 2.508                     | 2.312                 | 4.932                  | 4.915                   | 0.024               | 0.257                      | 0.062                |
| (1.3 <i>m</i> , 13.0°) | Mean | 0.114                     | 0.162                     | 0.029                 | 0.118                  | 1.349                   | 0.004               | 0.072                      | 0.018                |
|                        | Max  | 4.336                     | 4.804                     | 0.805                 | 4.715                  | 4.898                   | 0.024               | 0.257                      | 0.066                |
| (1.4 <i>m</i> , 14.0°) | Mean | 0.155                     | 0.192                     | 0.116                 | 0.226                  | 1.332                   | 0.004               | 0.072                      | 0.018                |
|                        | Max  | 4.336                     | 4.822                     | 3.436                 | 4.715                  | 4.890                   | 0.024               | 0.257                      | 0.077                |
| (1.5 <i>m</i> , 15.0°) | Mean | 0.161                     | 0.163                     | 0.232                 | 0.310                  | 1.379                   | 0.004               | 0.072                      | 0.018                |
|                        | Max  | 4.713                     | 4.206                     | 4.669                 | 4.716                  | N/A                     | 0.024               | 0.257                      | 0.052                |
| (1.6 <i>m</i> , 16.0°) | Mean | 0.197                     | 0.094                     | 0.250                 | 0.342                  | 1.590                   | 0.004               | 0.072                      | 0.019                |
|                        | Max  | 4.712                     | 3.052                     | 4.505                 | 4.715                  | 4.884                   | 0.024               | 0.257                      | 0.055                |
| (1.7 <i>m</i> , 17.0°) | Mean | 0.229                     | 0.286                     | 0.238                 | 0.323                  | 1.678                   | 0.004               | 0.072                      | 0.017                |
|                        | Max  | N/A                       | N/A                       | 4.694                 | N/A                    | 4.952                   | 0.024               | 0.257                      | 0.063                |
| (1.8 <i>m</i> , 18.0°) | Mean | 0.276                     | 0.345                     | 0.314                 | 0.241                  | 1.681                   | 0.004               | 0.072                      | 0.017                |
|                        | Max  | 6.365                     | N/A                       | 4.704                 | 4.714                  | 4.881                   | 0.024               | 0.257                      | 0.059                |
| (1.9 <i>m</i> , 19.0°) | Mean | 0.244                     | 0.380                     | 0.316                 | 0.376                  | 1.768                   | 0.004               | 0.072                      | 0.017                |
|                        | Max  | N/A                       | N/A                       | 4.547                 | N/A                    | N/A                     | 0.024               | 0.257                      | 0.048                |
| (2.0 <i>m</i> , 20.0°) | Mean | 0.387                     | 0.343                     | 0.360                 | 0.325                  | 1.826                   | 0.004               | 0.072                      | 0.017                |
|                        | Max  | N/A                       | N/A                       | 4.505                 | N/A                    | 4.885                   | 0.024               | 0.257                      | 0.046                |

Table 3. The performance evaluation given different initial errors by illustrating the translational errors. The performance of the ICP family and the NDT gradually deteriorates as the initial pose errors increase. the CPD and 3DFeat-Net methods are not influenced by the initial errors as they are global methods. Our DeepVCP achieves high accuracy consistently demonstrating the matching robustness using deep features.

| Initial Error |      | ICP-Po2Po<br>(deg) | ICP-Po2Pl<br>(deg) | G-ICP<br>(deg) | AA-ICP<br>(deg) | NDT-P2D<br>(deg) | CPD<br>(deg) | 3DFeat-Net<br>(deg) | Ours<br>(deg) |
|---------------|------|--------------------|--------------------|----------------|-----------------|------------------|--------------|---------------------|---------------|
| (0.1m, 1.0°)  | Mean | 0.594              | 0.285              | 0.254          | 0.401           | 0.104            | 0.070        | 1.654               | 0.465         |
|               | Max  | 2.470              | 1.264              | 1.247          | 2.451           | 0.346            | 0.427        | 6.129               | 1.538         |
| (0.2m, 2.0°)  | Mean | 0.636              | 0.291              | 0.291          | 0.405           | 0.213            | 0.070        | 1.654               | 0.513         |
|               | Max  | 2.623              | 1.348              | 1.558          | 2.464           | 7.420            | 0.427        | 6.129               | 1.359         |
| (0.3m, 3.0°)  | Mean | 0.660              | 0.293              | 0.270          | 0.404           | 0.856            | 0.070        | 1.654               | 0.446         |
|               | Max  | 2.658              | 1.439              | 1.097          | 2.457           | 15.47            | 0.427        | 6.129               | 1.419         |
| (0.4m, 4.0°)  | Mean | 0.677              | 0.294              | 0.289          | 0.419           | 3.238            | 0.070        | 1.654               | 0.448         |
|               | Max  | 2.628              | 1.453              | 1.068          | 2.465           | 33.00            | 0.427        | 6.129               | 1.198         |
| (0.5m, 5.0°)  | Mean | 0.690              | 0.298              | 0.288          | 0.480           | 5.819            | 0.070        | 1.654               | 0.465         |
|               | Max  | 2.627              | 1.458              | 1.071          | 7.047           | 50.14            | 0.427        | 6.129               | 1.470         |
| (0.6m, 6.0°)  | Mean | 0.701              | 0.302              | 0.305          | 0.440           | 7.577            | 0.070        | 1.654               | 0.452         |
|               | Max  | 2.613              | 1.457              | 1.023          | 4.547           | N/A              | 0.427        | 6.129               | 1.158         |
| (0.7m, 7.0°)  | Mean | 0.702              | 0.310              | 0.305          | 0.401           | 9.042            | 0.070        | 1.654               | 0.456         |
|               | Max  | 2.603              | 1.457              | 1.060          | 2.448           | N/A              | 0.427        | 6.129               | 1.416         |
| (0.8m, 8.0°)  | Mean | 0.708              | 0.313              | 0.354          | 0.380           | 9.538            | 0.070        | 1.654               | 0.437         |
|               | Max  | 2.633              | 1.453              | 2.806          | 2.543           | N/A              | 0.427        | 6.129               | 1.220         |
| (0.9m, 9.0°)  | Mean | 0.706              | 0.309              | 0.320          | 0.698           | 12.12            | 0.070        | 1.654               | 0.446         |
|               | Max  | 2.659              | 1.452              | 1.777          | 30.93           | N/A              | 0.427        | 6.129               | 1.427         |
| (1.0m, 10.0°) | Mean | 0.700              | 0.729              | 0.595          | 0.732           | 15.76            | 0.070        | 1.654               | 0.406         |
|               | Max  | 2.679              | 42.69              | 24.84          | 33.27           | N/A              | 0.427        | 6.129               | 1.386         |
| (1.1m, 11.0°) | Mean | 0.706              | 1.791              | 0.623          | 0.692           | 14.49            | 0.070        | 1.654               | 0.440         |
|               | Max  | 2.697              | 63.15              | 26.29          | N/A             | N/A              | 0.427        | 6.129               | 1.423         |
| (1.2m, 12.0°) | Mean | 1.077              | 1.680              | 1.077          | 1.166           | 17.92            | 0.070        | 1.654               | 0.458         |
|               | Max  | N/A                | 63.15              | N/A            | N/A             | N/A              | 0.427        | 6.129               | 1.785         |
| (1.3m, 13.0°) | Mean | 1.517              | 2.147              | 0.648          | 1.161           | 17.68            | 0.070        | 1.654               | 0.391         |
|               | Max  | N/A                | N/A                | N/A            | N/A             | N/A              | 0.427        | 6.129               | 1.275         |
| (1.4m, 14.0°) | Mean | 1.516              | 1.935              | 1.872          | 1.292           | 17.48            | 0.070        | 1.654               | 0.445         |
|               | Max  | N/A                | N/A                | N/A            | N/A             | N/A              | 0.427        | 6.129               | 1.416         |
| (1.5m, 15.0°) | Mean | 1.513              | 1.875              | 1.513          | 0.717           | 18.43            | 0.070        | 1.654               | 0.440         |
|               | Max  | N/A                | N/A                | N/A            | N/A             | N/A              | 0.427        | 6.129               | 1.176         |
| (1.6m, 16.0°) | Mean | 1.078              | 1.763              | 2.306          | 1.760           | 17.27            | 0.070        | 1.654               | 0.481         |
|               | Max  | N/A                | N/A                | N/A            | N/A             | N/A              | 0.427        | 6.129               | 1.330         |
| (1.7m, 17.0°) | Mean | 1.874              | 1.770              | 2.722          | 1.787           | 16.85            | 0.070        | 1.654               | 0.446         |
|               | Max  | N/A                | N/A                | N/A            | N/A             | N/A              | 0.427        | 6.129               | 1.338         |
| (1.8m, 18.0°) | Mean | 2.263              | 1.836              | 3.922          | 0.894           | 20.44            | 0.070        | 1.654               | 0.419         |
|               | Max  | N/A                | N/A                | N/A            | N/A             | N/A              | 0.427        | 6.129               | 1.340         |
| (1.9m, 19.0°) | Mean | 2.275              | 2.226              | 2.628          | 3.124           | 21.49            | 0.070        | 1.654               | 0.423         |
|               | Max  | N/A                | N/A                | N/A            | N/A             | N/A              | 0.427        | 6.129               | 1.142         |
| (2.0m, 20.0°) | Mean | 2.725              | 1.665              | 2.516          | 1.782           | 18.70            | 0.070        | 1.654               | 0.423         |
|               | Max  | N/A                | N/A                | N/A            | N/A             | N/A              | 0.427        | 6.129               | 1.140         |

Table 4. The performance evaluation given different initial errors by illustrating angular errors. The performance of the ICP family and the NDT gradually deteriorates as the initial pose errors increase. The CPD and 3DFeat-Net methods are not influenced by the initial errors as they are global methods. Our DeepVCP achieves high accuracy consistently, demonstrating the matching robustness using deep features.
